# Supplementary material
Source: publisher site journal article supplement (https://www.dovepress.com/article/306816)
Supplement: Supplementary file 1 [file get_supplementary_file.php]

**Supplementary files**


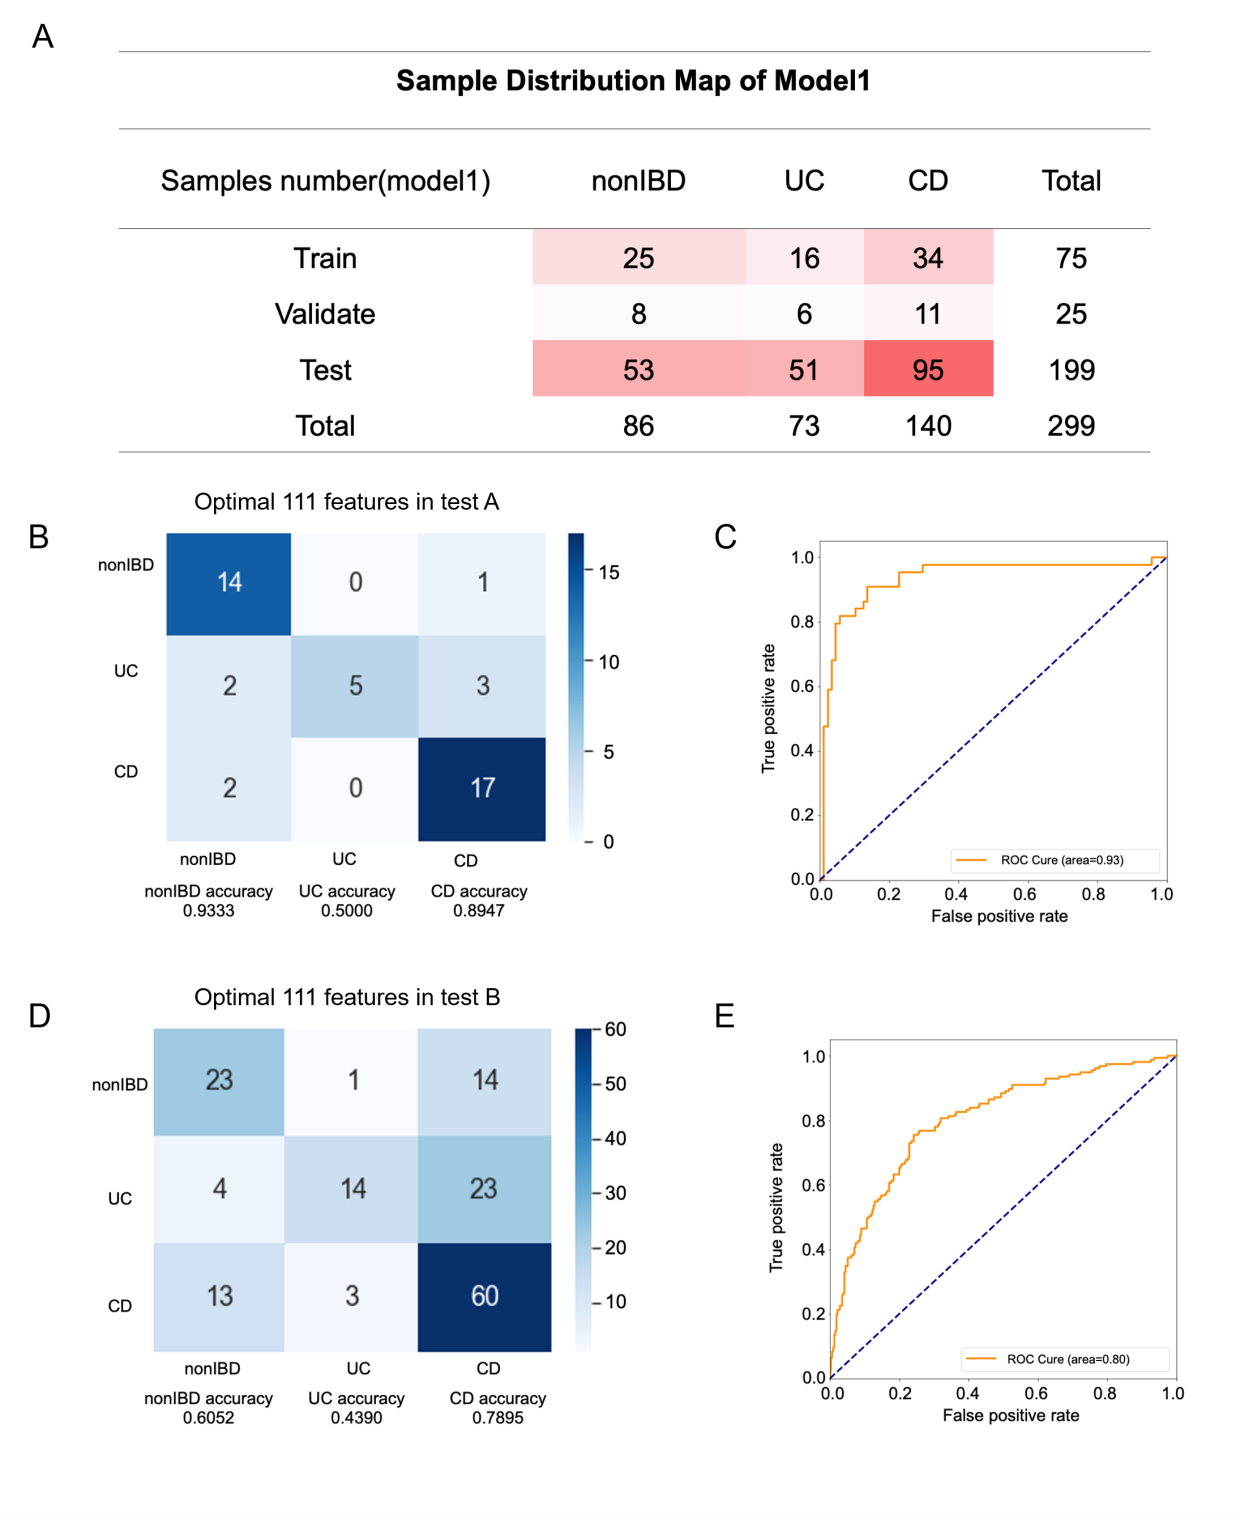


**Supplementary Figure s1** Model 1 detailed information during the modeling process. All sample distributions and labels involved in model1 (**A**). The confusion matrix (**B**) and AUC value (**C**) of test A (44 samples) in the total test set. The confusion matrix (**D**) and AUC value (**E**) of test B (155 samples) in the total test set.


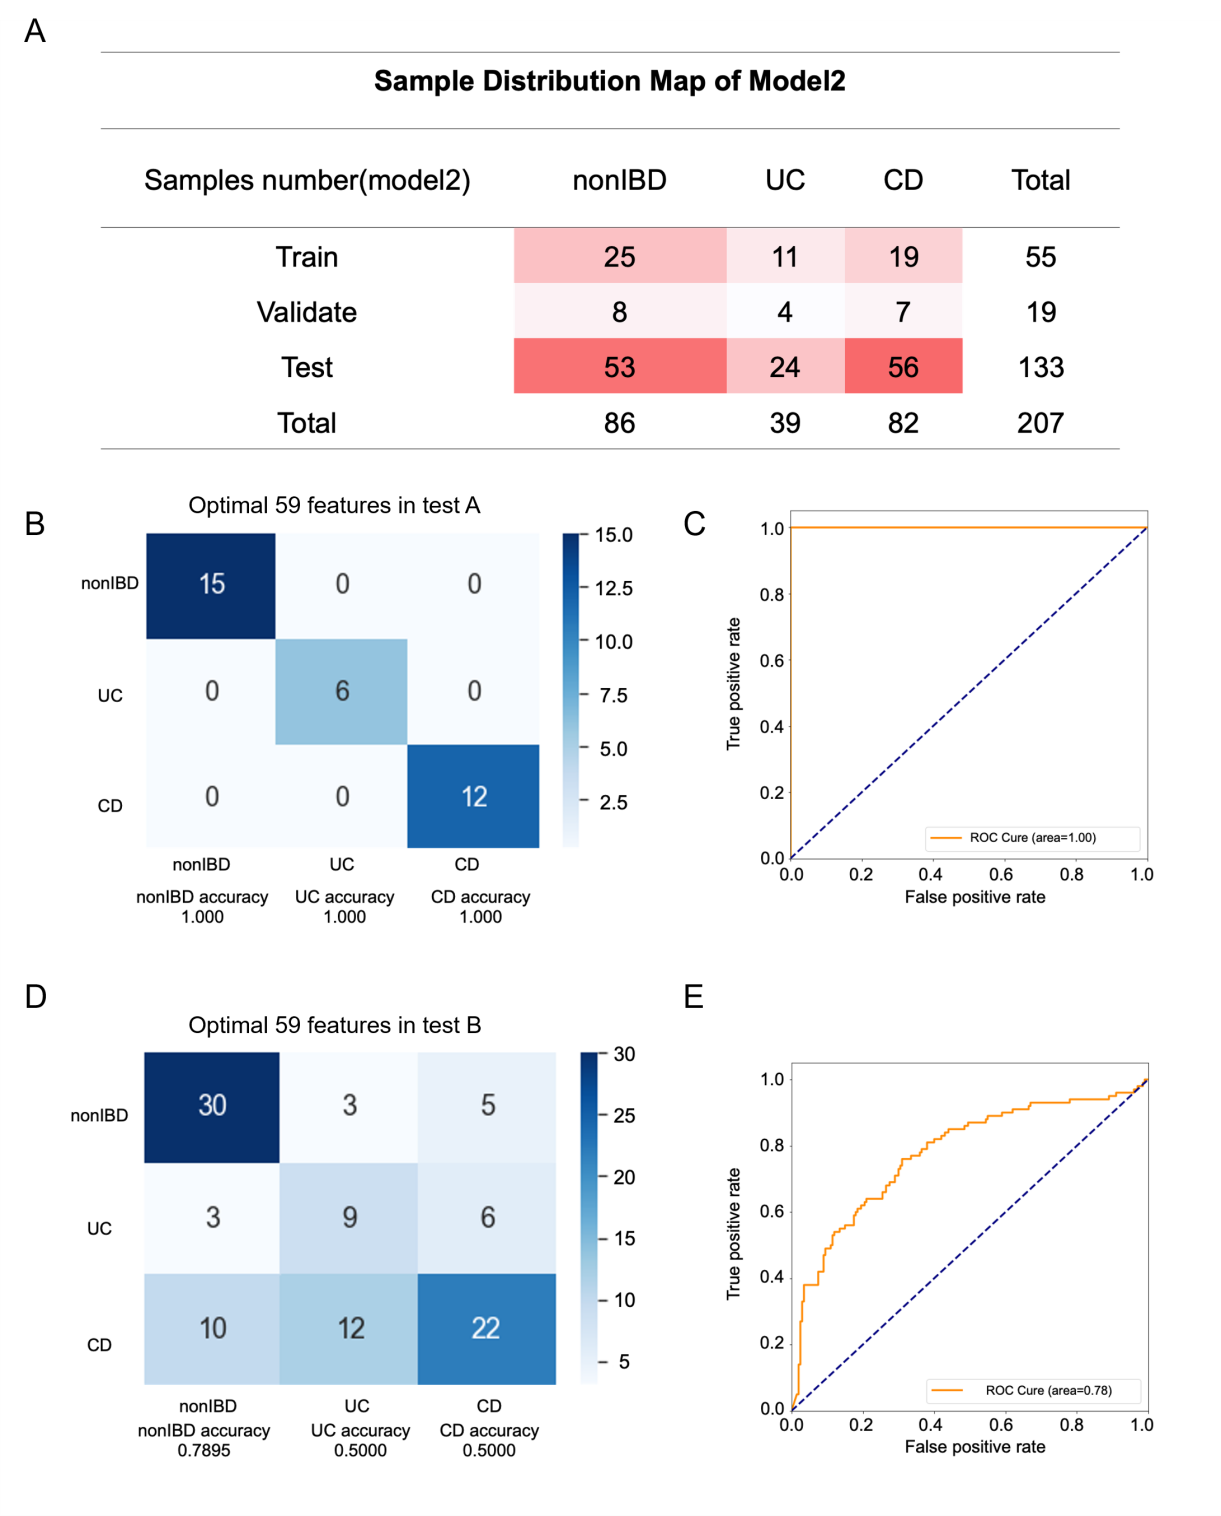


**Supplementary Figure s2** Model 2 detailed information during the modeling process. All sample distributions and labels involved in model 2 (**A**). The confusion matrix (**B**) and AUC value (**C**) of test A (33 samples) in the total test set. The confusion matrix (**D**) and AUC value (**E**) of test B (100 samples) in the total test set.


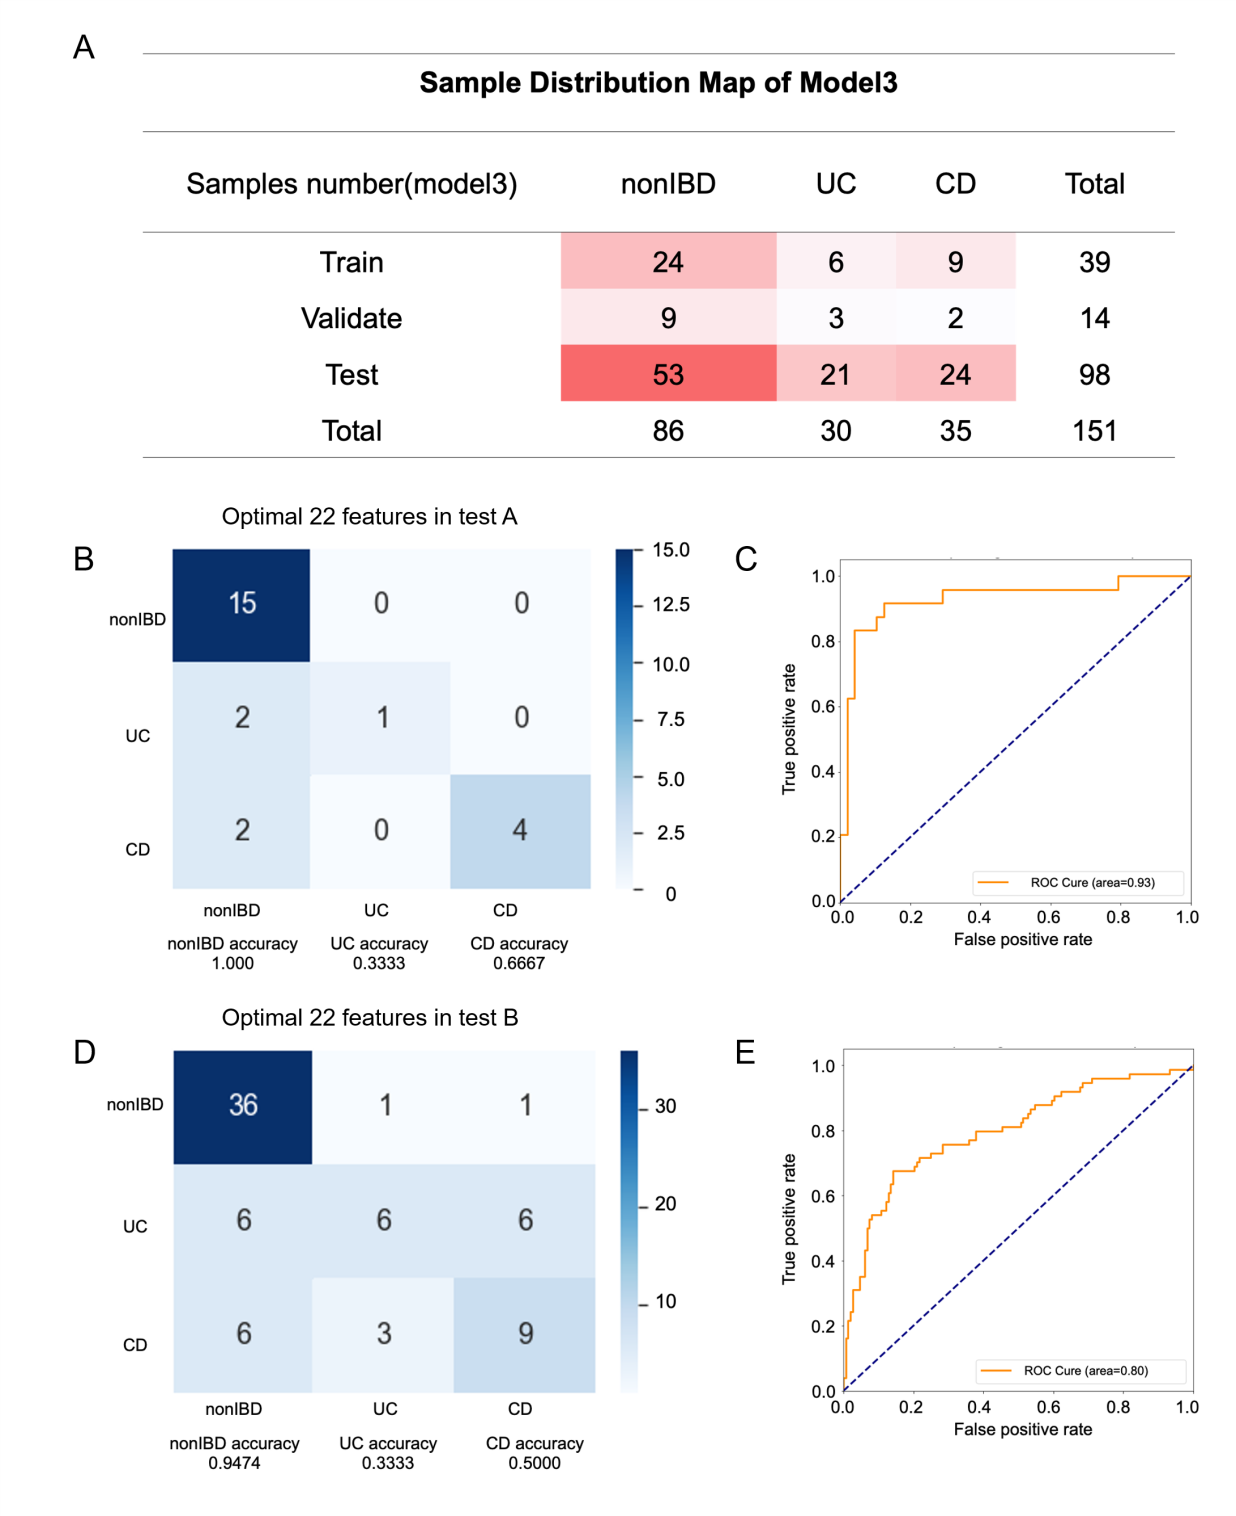


**Supplementary Figure s3** Model 3 detailed information during the modeling process. All sample distributions and labels involved in model 3 (**A**). The confusion matrix (**B**) and AUC value (**C**) of test A (24 samples) in the total test set. The confusion matrix (**D**) and AUC value (**E**) of test B (74 samples) in the total test set.


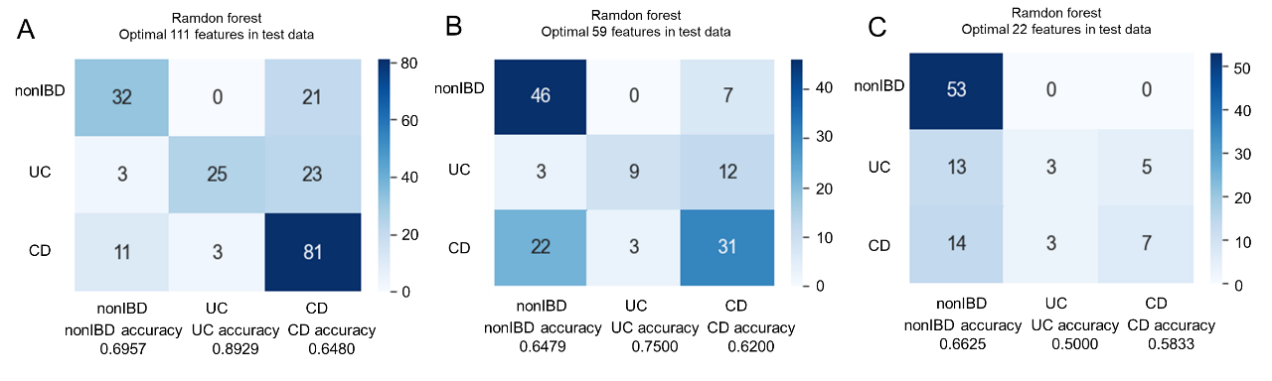


**Supplementary Figure s4** the prediction accuracy obtained by the random forest classifier. The random forest classifier uses 111 markers obtained from model1 to make predictions (**A**). 59 markers obtained from model1 to make predictions (**B**). 22 markers obtained from model1 to make predictions (**C**).

| **Supplementary Table s1：Self-evaluation criteria and demographic information** | | | | | | | |
| --- | --- | --- | --- | --- | --- | --- | --- |
| **Self evaluation** | | **Slightly below par (65 samples)** | | | **very well(121 samples)** | | |
| **variable name** | **variable** | **frequency** | **percentage(%)** | **Cumulative percentage(%)** | **frequency** | **percentage(%)** | **Cumulative percentage(%)** |
| **sex** | **male** | 27 | 41.54 | 41.54 | 66 | 54.55 | 54.55 |
| **female** | 38 | 58.46 | 100 | 55 | 45.45 | 100 |
| **diagnosis** | **UC** | 29 | 44.62 | 44.62 | 39 | 32.23 | 32.23 |
| **CD** | 36 | 55.38 | 100 | 82 | 67.77 | 100 |
| **Anal fissure** | **YES** | 1 | 1.54 | 1.54 | 3 | 2.48 | 2.48 |
| **NO** | 64 | 98.46 | 100 | 118 | 97.52 | 100 |
| **Abscess** | **YES** | 2 | 3.08 | 3.08 | 1 | 0.83 | 0.83 |
| **NO** | 63 | 96.92 | 100 | 120 | 99.17 | 100 |
| **Abdominal pain** | **Mild** | 24 | 36.92 | 36.92 | 25 | 20.66 | 20.66 |
| **Moderate** | 4 | 6.15 | 43.08 | 1 | 0.83 | 21.49 |
| **None** | 37 | 56.92 | 100 | 95 | 78.51 | 100 |
| **Number of liquid or very soft stools in the past 24 hours** | **0~1** | 22 | 33.85 | 33.85 | 67 | 55.37 | 55.37 |
| **2~3** | 6 | 9.23 | 43.08 | 7 | 5.79 | 61.16 |
| **>=4** | 6 | 9.23 | 52.31 | 4 | 3.31 | 64.46 |
| **None** | 31 | 47.69 | 100 | 43 | 35.54 | 100 |
| **Arthralgia** | **YES** | 1 | 1.54 | 1.54 | 3 | 2.48 | 2.48 |
| **NO** | 64 | 98.46 | 100 | 118 | 97.52 | 100 |
| **hbi** | **0~3** | 20 | 30.77 | 30.77 | 72 | 59.5 | 59.5 |
| **4~6** | 9 | 13.85 | 44.62 | 3 | 2.48 | 61.98 |
| **7~9** | 5 | 7.69 | 52.31 | 0 | 0 | 61.98 |
| **None** | 31 | 47.69 | 100 | 46 | 38.02 | 100 |
| **Arthralgias** | **YES** | 2 | 3.08 | 3.08 | 2 | 1.65 | 1.65 |
| **NO** | 63 | 96.92 | 100 | 119 | 98.35 | 100 |
| **Bowel frequency during the day** | **0~3** | 28 | 43.08 | 43.08 | 35 | 28.93 | 28.93 |
| **>3** | 2 | 3.08 | 46.16 | 6 | 4.96 | 33.89 |
| **None** | 35 | 53.85 | 100 | 80 | 66.12 | 100 |
| **Urgency of defecation** | **Hurry** | 14 | 21.54 | 21.54 | 20 | 16.53 | 16.53 |
| **Immediately** | 2 | 3.08 | 24.62 | 2 | 1.65 | 18.18 |
| **Incontinence** | 1 | 1.54 | 26.16 | 0 | 0 | 18.18 |
| **None** | 48 | 73.85 | 100 | 99 | 81.82 | 100 |
| **Blood in the stool** | **Trace (a little blood)** | 17 | 26.15 | 26.15 | 13 | 10.74 | 10.74 |
| **Occasionally frank (ocassionally a lot of blood)** | 1 | 1.54 | 27.69 | 2 | 1.65 | 12.39 |
| **Usually frank (usually a lot of blood)** | 1 | 1.54 | 29.23 | 1 | 0.83 | 13.22 |
| **None** | 46 | 70.77 | 100 | 105 | 86.78 | 100 |
| **sccai** | **0~2** | 19 | 29.23 | 29.23 | 33 | 27.27 | 27.27 |
| **3~4** | 8 | 12.31 | 41.54 | 7 | 5.79 | 33.06 |
| **5~7** | 3 | 4.62 | 46.15 | 1 | 0.83 | 33.88 |
| **None** | 35 | 53.85 | 100 | 80 | 66.12 | 100 |

| **Supplementary Table s2:** **Wilcoxon rank-sum test of all biomarkers of model1** | | | | | | | | | | | | |
| --- | --- | --- | --- | --- | --- | --- | --- | --- | --- | --- | --- | --- |
| **Markers** | **nonIBD_mean** | **UC_mean** | **CD_mean** | **log2(fc-nonIBD vs. UC)** | **Pvalue-nonIBD vs. UC)** | **FDR-nonIBD vs. UC)** | **log2(fc-UC vs. CD)** | **Pvalue-UC vs. CD** | **FDR-UC vs. CD** | **log2(fc-nonIBD vs. CD)** | **Pvalue-nonIBD vs. CD** | **FDR-nonIBD vs. CD** |
| HILp_QI4542 | 418824.88 | 293819.12 | 269344.35 | -0.51 | 0.00 | 0.00 | -0.13 | 0.92 | 0.93 | -0.64 | 0.00 | 0.00 |
| HILn_QI8463 | 5161.49 | 8163.74 | 147551.64 | 0.66 | 0.00 | 0.00 | 4.18 | 0.00 | 0.00 | 4.84 | 0.00 | 0.00 |
| C18n_QI13633 | 295.09 | 48977.77 | 5707.69 | 7.37 | 0.00 | 0.00 | -3.10 | 0.00 | 0.00 | 4.27 | 0.03 | 0.06 |
| C18n_QI2985 | 3402.92 | 104698.27 | 32608.55 | 4.94 | 0.00 | 0.00 | -1.68 | 0.00 | 0.00 | 3.26 | 0.00 | 0.00 |
| C18n_QI6575 | 61.65 | 492262.25 | 192340.18 | 12.96 | 0.00 | 0.00 | -1.36 | 0.00 | 0.00 | 11.61 | 0.00 | 0.00 |
| C8p_QI8796 | 16594.37 | 148201.73 | 230723.81 | 3.16 | 0.00 | 0.00 | 0.64 | 0.26 | 0.39 | 3.80 | 0.00 | 0.00 |
| C8p_QI5458 | 19418.55 | 7087.96 | 6364.06 | -1.45 | 0.01 | 0.03 | -0.16 | 0.12 | 0.23 | -1.61 | 0.00 | 0.00 |
| C18n_QI2282 | 7263.36 | 5142.48 | 6033.28 | -0.50 | 0.00 | 0.00 | 0.23 | 0.84 | 0.88 | -0.27 | 0.00 | 0.00 |
| C18n_QI10481 | 6924.70 | 5527.25 | 12938.29 | -0.33 | 0.28 | 0.38 | 1.23 | 0.00 | 0.00 | 0.90 | 0.00 | 0.00 |
| 6.1.1.14: Glycine--tRNA ligase|g__Bacteroides.s__Bacteroides_stercoris | 0.00 | 0.00 | 0.00 | -0.33 | 0.26 | 0.37 | 0.32 | 0.65 | 0.75 | 0.00 | 0.07 | 0.12 |
| HILp_QI3109 | 23016.12 | 269914.41 | 55606.69 | 3.55 | 0.00 | 0.00 | -2.28 | 0.00 | 0.00 | 1.27 | 0.25 | 0.33 |
| HILn_QI3904 | 1802.94 | 248.29 | 497.70 | -2.86 | 0.00 | 0.00 | 1.00 | 0.00 | 0.02 | -1.86 | 0.00 | 0.00 |
| C8p_QI14747 | 53472.52 | 17259.47 | 34950.06 | -1.63 | 0.00 | 0.00 | 1.02 | 0.00 | 0.01 | -0.61 | 0.00 | 0.00 |
| HILn_QI24418 | 49433.71 | 16139.18 | 42527.46 | -1.61 | 0.00 | 0.00 | 1.40 | 0.00 | 0.00 | -0.22 | 0.00 | 0.00 |
| HILn_QI15191 | 45864.31 | 13964.60 | 18764.34 | -1.72 | 0.00 | 0.00 | 0.43 | 0.21 | 0.33 | -1.29 | 0.00 | 0.00 |
| HILn_QI3222 | 94.64 | 48070.64 | 28783.76 | 8.99 | 0.00 | 0.00 | -0.74 | 0.00 | 0.00 | 8.25 | 0.00 | 0.00 |
| C18n_QI8756 | 3981.17 | 108300.59 | 26507.14 | 4.77 | 0.00 | 0.00 | -2.03 | 0.00 | 0.00 | 2.74 | 0.00 | 0.00 |
| HILn_QI1116 | 12903.50 | 5070.51 | 9582.21 | -1.35 | 0.00 | 0.00 | 0.92 | 0.00 | 0.01 | -0.43 | 0.00 | 0.00 |
| HILp_QI5082 | 15397.21 | 2755.88 | 8160.39 | -2.48 | 0.00 | 0.00 | 1.57 | 0.19 | 0.32 | -0.92 | 0.00 | 0.00 |
| C8p_QI6477 | 30223.05 | 7214.49 | 7329.01 | -2.07 | 0.00 | 0.00 | 0.02 | 0.02 | 0.04 | -2.04 | 0.00 | 0.00 |
| C8p_QI3478 | 9300.81 | 13033.89 | 15390.52 | 0.49 | 0.00 | 0.00 | 0.24 | 0.00 | 0.01 | 0.73 | 0.44 | 0.53 |
| C18n_QI8909 | 32701.59 | 25802.34 | 36039.92 | -0.34 | 0.04 | 0.07 | 0.48 | 0.02 | 0.05 | 0.14 | 0.90 | 0.92 |
| C18n_QI12710 | 4295.57 | 3610.38 | 7403.06 | -0.25 | 0.95 | 0.95 | 1.04 | 0.00 | 0.00 | 0.79 | 0.00 | 0.00 |
| HILn_QI17951 | 131.35 | 131.41 | 66.96 | 0.00 | 0.47 | 0.57 | -0.97 | 0.19 | 0.32 | -0.97 | 0.59 | 0.66 |
| HILn_QI33358 | 1364.14 | 524.32 | 786.80 | -1.38 | 0.00 | 0.00 | 0.59 | 0.13 | 0.24 | -0.79 | 0.00 | 0.00 |
| HILn_QI8112 | 85406.30 | 79997.11 | 52530.55 | -0.09 | 0.01 | 0.01 | -0.61 | 0.00 | 0.00 | -0.70 | 0.06 | 0.11 |
| HILn_QI8306 | 31858.80 | 18562.92 | 17843.51 | -0.78 | 0.00 | 0.01 | -0.06 | 0.16 | 0.28 | -0.84 | 0.00 | 0.00 |
| C18n_QI506 | 16120.91 | 8351.96 | 14958.32 | -0.95 | 0.04 | 0.08 | 0.84 | 0.00 | 0.00 | -0.11 | 0.19 | 0.26 |
| 3.5.1.88: Peptide deformylase|g__Parabacteroides.s__Parabacteroides_merdae | 0.00 | 0.00 | 0.00 | -0.73 | 0.59 | 0.68 | -0.79 | 0.00 | 0.00 | -1.52 | 0.00 | 0.00 |
| HILp_QI2187 | 98256.72 | 48633.14 | 53736.01 | -1.01 | 0.04 | 0.07 | 0.14 | 0.61 | 0.72 | -0.87 | 0.00 | 0.00 |
| HILn_QI31972 | 792.47 | 747.22 | 621.34 | -0.08 | 0.88 | 0.90 | -0.27 | 0.11 | 0.22 | -0.35 | 0.12 | 0.19 |
| HILp_QI12884 | 65089.58 | 47908.97 | 38718.73 | -0.44 | 0.16 | 0.26 | -0.31 | 0.02 | 0.04 | -0.75 | 0.00 | 0.00 |
| C8p_QI23150 | 57732.51 | 27983.73 | 12115.56 | -1.04 | 0.00 | 0.00 | -1.21 | 0.01 | 0.04 | -2.25 | 0.00 | 0.00 |
| C18n_QI7082 | 11434.49 | 22081.26 | 20451.56 | 0.95 | 0.01 | 0.03 | -0.11 | 0.67 | 0.75 | 0.84 | 0.00 | 0.00 |
| C18n_QI1231 | 46524.14 | 35919.22 | 38481.20 | -0.37 | 0.00 | 0.00 | 0.10 | 0.12 | 0.23 | -0.27 | 0.01 | 0.02 |
| 1.5.1.20: Methylenetetrahydrofolate reductase (NAD(P)H) | 0.00 | 0.00 | 0.00 | -0.06 | 0.41 | 0.52 | -0.09 | 0.38 | 0.51 | -0.15 | 0.12 | 0.19 |
| C8p_QI27992 | 52606.12 | 116864.97 | 145038.74 | 1.15 | 0.00 | 0.01 | 0.31 | 0.22 | 0.35 | 1.46 | 0.00 | 0.00 |
| HILn_QI31959 | 16099.99 | 17181.99 | 11979.73 | 0.09 | 0.14 | 0.23 | -0.52 | 0.04 | 0.08 | -0.43 | 0.00 | 0.00 |
| C8p_QI24209 | 3501.99 | 187700.85 | 47679.13 | 5.74 | 0.00 | 0.00 | -1.98 | 0.00 | 0.00 | 3.77 | 0.21 | 0.29 |
| C8p_QI4934 | 1537754.86 | 2103321.14 | 2625295.56 | 0.45 | 0.14 | 0.23 | 0.32 | 0.09 | 0.18 | 0.77 | 0.00 | 0.00 |
| C18n_QI13144 | 86758.40 | 37269.36 | 40399.16 | -1.22 | 0.00 | 0.00 | 0.12 | 0.38 | 0.51 | -1.10 | 0.00 | 0.00 |
| C18n_QI5020 | 14335.09 | 6904.90 | 18528.49 | -1.05 | 0.00 | 0.00 | 1.42 | 0.00 | 0.00 | 0.37 | 0.42 | 0.51 |
| HILp_QI10799 | 91670.26 | 72740.22 | 59958.09 | -0.33 | 0.03 | 0.06 | -0.28 | 0.28 | 0.40 | -0.61 | 0.00 | 0.00 |
| C8p_QI7645 | 22200.21 | 17719.29 | 25293.41 | -0.33 | 0.00 | 0.00 | 0.51 | 0.00 | 0.00 | 0.19 | 0.09 | 0.14 |
| C8p_QI13043 | 34531.38 | 28431.95 | 19037.98 | -0.28 | 0.27 | 0.38 | -0.58 | 0.01 | 0.02 | -0.86 | 0.00 | 0.00 |
| 1.3.1.98: UDP-N-acetylmuramate dehydrogenase|g__Burkholderiales_noname.s__Burkholderiales_bacterium_1_1_47 | 0.00 | 0.00 | 0.00 | 2.50 | 0.00 | 0.00 | -0.84 | 0.02 | 0.06 | 1.65 | 0.03 | 0.06 |
| C8p_QI15419 | 26545.85 | 10093.67 | 24610.11 | -1.40 | 0.00 | 0.01 | 1.29 | 0.13 | 0.25 | -0.11 | 0.04 | 0.08 |
| HILp_QI4387 | 31361.69 | 44600.18 | 102367.16 | 0.51 | 0.08 | 0.14 | 1.20 | 0.00 | 0.01 | 1.71 | 0.00 | 0.00 |
| C8p_QI29484 | 437528.59 | 254392.68 | 299300.41 | -0.78 | 0.00 | 0.00 | 0.23 | 0.58 | 0.70 | -0.55 | 0.00 | 0.00 |
| HILp_QI9539 | 1528.90 | 1278.93 | 1033.04 | -0.26 | 0.37 | 0.50 | -0.31 | 0.00 | 0.02 | -0.57 | 0.00 | 0.00 |
| HILp_QI2026 | 5645.58 | 3384.68 | 8266.01 | -0.74 | 0.01 | 0.03 | 1.29 | 0.69 | 0.75 | 0.55 | 0.05 | 0.10 |
| C18n_QI13314 | 198939.86 | 140891.01 | 120335.19 | -0.50 | 0.00 | 0.00 | -0.23 | 0.55 | 0.67 | -0.73 | 0.00 | 0.00 |
| C8p_QI23 | 19652.38 | 22701.93 | 75915.61 | 0.21 | 0.00 | 0.00 | 1.74 | 0.80 | 0.86 | 1.95 | 0.00 | 0.00 |
| 6.3.4.15: Biotin--[acetyl-CoA-carboxylase] ligase|g__Bacteroides.s__Bacteroides_ovatus | 0.00 | 0.00 | 0.00 | 0.50 | 0.80 | 0.85 | 0.31 | 0.43 | 0.55 | 0.82 | 0.56 | 0.64 |
| HILp_QI2815 | 120334.72 | 116362.15 | 97292.31 | -0.05 | 0.50 | 0.60 | -0.26 | 0.14 | 0.25 | -0.31 | 0.03 | 0.06 |
| C18n_QI6372 | 19458.43 | 17177.45 | 17779.15 | -0.18 | 0.01 | 0.02 | 0.05 | 0.85 | 0.88 | -0.13 | 0.00 | 0.01 |
| HILp_QI7921 | 4323.10 | 5413.58 | 2912.36 | 0.32 | 0.36 | 0.48 | -0.89 | 0.00 | 0.00 | -0.57 | 0.00 | 0.00 |
| HILn_QI7559 | 100082.45 | 37012.21 | 32783.59 | -1.44 | 0.00 | 0.00 | -0.18 | 0.68 | 0.75 | -1.61 | 0.00 | 0.00 |
| C18n_QI10254 | 957852.85 | 478518.14 | 392155.04 | -1.00 | 0.04 | 0.08 | -0.29 | 0.05 | 0.10 | -1.29 | 0.00 | 0.00 |
| C8p_QI4276 | 19502.01 | 24045.08 | 18085.46 | 0.30 | 0.00 | 0.00 | -0.41 | 0.65 | 0.75 | -0.11 | 0.00 | 0.00 |
| HILp_QI20321 | 6765.23 | 24649.97 | 16741.01 | 1.87 | 0.01 | 0.01 | -0.56 | 0.00 | 0.00 | 1.31 | 0.17 | 0.25 |
| HILp_QI6087 | 1599.70 | 1421.16 | 4018.24 | -0.17 | 0.22 | 0.33 | 1.50 | 0.69 | 0.75 | 1.33 | 0.32 | 0.41 |
| 1.1.1.267: 1-deoxy-D-xylulose-5-phosphate reductoisomerase|g__Parabacteroides.s__Parabacteroides_distasonis | 0.00 | 0.00 | 0.00 | 1.52 | 0.00 | 0.00 | -0.75 | 0.00 | 0.01 | 0.77 | 0.43 | 0.52 |
| 4.2.1.2: Fumarate hydratase|g__Faecalibacterium.s__Faecalibacterium_prausnitzii | 0.00 | 0.00 | 0.00 | 0.57 | 0.26 | 0.37 | -1.02 | 0.00 | 0.00 | -0.44 | 0.01 | 0.02 |
| C18n_QI6774 | 5617.20 | 6498.85 | 6427.81 | 0.21 | 0.40 | 0.52 | -0.02 | 1.00 | 1.00 | 0.19 | 0.28 | 0.37 |
| C8p_QI6064 | 789.13 | 1051.15 | 2465.71 | 0.41 | 0.83 | 0.86 | 1.23 | 0.00 | 0.00 | 1.64 | 0.00 | 0.00 |
| C8p_QI22437 | 122944.71 | 90872.55 | 108591.58 | -0.44 | 0.01 | 0.01 | 0.26 | 0.67 | 0.75 | -0.18 | 0.00 | 0.01 |
| C8p_QI27233 | 195115.13 | 360728.99 | 263218.80 | 0.89 | 0.43 | 0.54 | -0.45 | 0.55 | 0.67 | 0.43 | 0.85 | 0.89 |
| C18n_QI10593 | 258190.36 | 300703.96 | 262138.85 | 0.22 | 0.08 | 0.14 | -0.20 | 0.06 | 0.13 | 0.02 | 0.69 | 0.76 |
| C8p_QI25824 | 44078.43 | 147174.34 | 105969.19 | 1.74 | 0.00 | 0.00 | -0.47 | 0.00 | 0.01 | 1.27 | 0.86 | 0.90 |
| 2.6.1.52: Phosphoserine transaminase | 0.01 | 0.01 | 0.01 | -0.11 | 0.24 | 0.35 | 0.22 | 0.12 | 0.23 | 0.11 | 0.55 | 0.63 |
| C18n_QI4365 | 10859.22 | 13361.29 | 29225.41 | 0.30 | 0.02 | 0.04 | 1.13 | 0.09 | 0.18 | 1.43 | 0.17 | 0.24 |
| HILp_QI5723 | 183835.31 | 469553.73 | 571266.81 | 1.35 | 0.00 | 0.00 | 0.28 | 0.40 | 0.52 | 1.64 | 0.00 | 0.01 |
| HILp_QI4614 | 2518.45 | 1316.88 | 2799.86 | -0.94 | 0.00 | 0.00 | 1.09 | 0.01 | 0.03 | 0.15 | 0.21 | 0.29 |
| 3.4.21.88: Repressor LexA|unclassified | 0.00 | 0.00 | 0.00 | 0.03 | 0.72 | 0.79 | -0.73 | 0.00 | 0.00 | -0.70 | 0.00 | 0.00 |
| HILn_QI24862 | 9878.37 | 6883.82 | 7478.49 | -0.52 | 0.12 | 0.19 | 0.12 | 0.43 | 0.55 | -0.40 | 0.35 | 0.44 |
| HILn_QI23150 | 6672.17 | 4942.03 | 8203.23 | -0.43 | 0.03 | 0.06 | 0.73 | 0.23 | 0.36 | 0.30 | 0.33 | 0.41 |
| HILp_QI5041 | 129602.88 | 121980.71 | 145617.71 | -0.09 | 0.58 | 0.68 | 0.26 | 0.55 | 0.67 | 0.17 | 0.98 | 0.98 |
| HILn_QI5881 | 31967.58 | 39254.04 | 36022.14 | 0.30 | 0.10 | 0.17 | -0.12 | 0.20 | 0.32 | 0.17 | 0.57 | 0.65 |
| HILn_QI782 | 2737.76 | 34477.51 | 2440.25 | 3.65 | 0.01 | 0.02 | -3.82 | 0.00 | 0.00 | -0.17 | 0.54 | 0.63 |
| HILp_QI7404 | 152525.86 | 145654.41 | 136303.33 | -0.07 | 0.13 | 0.21 | -0.10 | 0.91 | 0.93 | -0.16 | 0.07 | 0.12 |
| C18n_QI131 | 114504.76 | 116485.71 | 156977.31 | 0.02 | 0.47 | 0.57 | 0.43 | 0.01 | 0.02 | 0.46 | 0.01 | 0.03 |
| HILn_QI18073 | 160824.88 | 171703.85 | 351322.09 | 0.09 | 0.17 | 0.26 | 1.03 | 0.17 | 0.29 | 1.13 | 0.97 | 0.97 |
| HILp_QI5262 | 17826.71 | 18353.42 | 14230.65 | 0.04 | 0.75 | 0.81 | -0.37 | 0.02 | 0.06 | -0.33 | 0.03 | 0.07 |
| HILp_QI5704 | 90145.53 | 116977.77 | 94499.54 | 0.38 | 0.01 | 0.03 | -0.31 | 0.01 | 0.02 | 0.07 | 0.75 | 0.81 |
| HILp_QI11742 | 11246.40 | 5277.38 | 8968.49 | -1.09 | 0.00 | 0.00 | 0.77 | 0.03 | 0.07 | -0.33 | 0.03 | 0.06 |
| C8p_QI10951 | 18270.77 | 12516.19 | 15113.55 | -0.55 | 0.00 | 0.00 | 0.27 | 0.01 | 0.04 | -0.27 | 0.12 | 0.19 |
| 6.1.1.6: Lysine--tRNA ligase|g__Bacteroides.s__Bacteroides_caccae | 0.00 | 0.00 | 0.00 | 0.11 | 0.18 | 0.28 | 0.00 | 0.83 | 0.88 | 0.12 | 0.08 | 0.13 |
| HILn_QI13282 | 148992.81 | 108276.05 | 128211.13 | -0.46 | 0.95 | 0.95 | 0.24 | 0.28 | 0.40 | -0.22 | 0.43 | 0.52 |
| 2.10.1.1: Molybdopterin molybdotransferase | 0.00 | 0.00 | 0.00 | -0.36 | 0.56 | 0.66 | 1.64 | 0.24 | 0.36 | 1.28 | 0.07 | 0.12 |
| HILn_QI24132 | 1131.51 | 772.95 | 867.48 | -0.55 | 0.74 | 0.81 | 0.17 | 0.61 | 0.72 | -0.38 | 0.33 | 0.42 |
| HILp_QI4288 | 28239.41 | 30885.23 | 24979.10 | 0.13 | 0.47 | 0.57 | -0.31 | 0.23 | 0.36 | -0.18 | 0.63 | 0.70 |
| 1.5.1.2: Pyrroline-5-carboxylate reductase | 0.00 | 0.00 | 0.00 | -0.12 | 0.04 | 0.08 | 0.00 | 0.70 | 0.75 | -0.13 | 0.06 | 0.10 |
| C18n_QI7894 | 41313.06 | 34661.18 | 26184.01 | -0.25 | 0.95 | 0.95 | -0.40 | 0.14 | 0.26 | -0.66 | 0.15 | 0.23 |
| HILp_QI9423 | 108401.66 | 94237.75 | 66044.98 | -0.20 | 0.64 | 0.72 | -0.51 | 0.01 | 0.02 | -0.71 | 0.00 | 0.00 |
| HILp_QI2700 | 4787.41 | 78.32 | 7096.23 | -5.93 | 0.67 | 0.74 | 6.50 | 0.02 | 0.04 | 0.57 | 0.04 | 0.08 |
| C8p_QI16688 | 58314.85 | 101843.67 | 111753.48 | 0.80 | 0.04 | 0.07 | 0.13 | 0.26 | 0.39 | 0.94 | 0.00 | 0.00 |
| HILn_QI33327 | 254283.55 | 247536.63 | 326687.34 | -0.04 | 0.25 | 0.35 | 0.40 | 0.01 | 0.02 | 0.36 | 0.10 | 0.16 |
| C18n_QI13281 | 86201.15 | 105817.59 | 82036.61 | 0.30 | 0.77 | 0.82 | -0.37 | 0.51 | 0.65 | -0.07 | 0.83 | 0.88 |
| HILp_QI11840 | 223301.51 | 714793.53 | 121377.24 | 1.68 | 0.82 | 0.86 | -2.56 | 0.30 | 0.43 | -0.88 | 0.17 | 0.25 |
| 2.7.7.2: FAD synthetase|g__Clostridium.s__Clostridium_leptum | 0.00 | 0.00 | 0.00 | -1.65 | 0.08 | 0.15 | 0.98 | 0.43 | 0.55 | -0.67 | 0.00 | 0.01 |
| HILn_QI1241 | 19224.60 | 88418.47 | 74334.20 | 2.20 | 0.47 | 0.57 | -0.25 | 0.65 | 0.75 | 1.95 | 0.10 | 0.16 |
| 1.17.1.8: 4-hydroxy-tetrahydrodipicolinate reductase|g__Bacteroides.s__Bacteroides_vulgatus | 0.00 | 0.00 | 0.00 | 0.36 | 0.56 | 0.66 | -0.13 | 0.34 | 0.48 | 0.23 | 0.67 | 0.73 |
| HILp_QI18079 | 8207.24 | 1974.52 | 19678.98 | -2.06 | 0.22 | 0.33 | 3.32 | 0.03 | 0.07 | 1.26 | 0.32 | 0.41 |
| C18n_QI8468 | 120697.47 | 161653.27 | 185268.14 | 0.42 | 0.33 | 0.45 | 0.20 | 0.19 | 0.32 | 0.62 | 0.87 | 0.91 |
| HILn_QI4584 | 647.27 | 151.78 | 345.19 | -2.09 | 0.24 | 0.35 | 1.19 | 1.00 | 1.00 | -0.91 | 0.17 | 0.24 |
| HILp_QI10651 | 78829.45 | 106878.10 | 139180.77 | 0.44 | 0.42 | 0.54 | 0.38 | 0.37 | 0.51 | 0.82 | 0.91 | 0.92 |
| HILn_QI8435 | 351.98 | 376.14 | 434.46 | 0.10 | 0.04 | 0.08 | 0.21 | 0.35 | 0.49 | 0.30 | 0.13 | 0.19 |
| 2.7.2.1: Acetate kinase|g__Streptococcus.s__Streptococcus_thermophilus | 0.00 | 0.00 | 0.00 | -1.27 | 0.63 | 0.71 | 0.00 | 0.02 | 0.04 | -0.20 | 0.00 | 0.01 |
| HILn_QI25300 | 3542.85 | 14936.64 | 4412.05 | 2.08 | 0.00 | 0.01 | -1.76 | 0.03 | 0.08 | 0.32 | 0.23 | 0.31 |
| C8p_QI25956 | 48768.70 | 13608.21 | 31251.64 | -1.84 | 0.01 | 0.02 | 1.20 | 0.02 | 0.06 | -0.64 | 0.45 | 0.53 |

| **Supplementary Table s3:** **Wilcoxon rank-sum test of all biomarkers of model2** | | | | | | | | | | | | |
| --- | --- | --- | --- | --- | --- | --- | --- | --- | --- | --- | --- | --- |
| **Markers** | **nonIBD_mean** | **UC_mean** | **CD_mean** | **log2(fc-nonIBD vs. UC)** | **Pvalue-nonIBD vs. UC)** | **FDR-nonIBD vs. UC)** | **log2(fc-UC vs. CD)** | **Pvalue-UC vs. CD** | **FDR-UC vs. CD** | **log2(fc-nonIBD vs. CD)** | **Pvalue-nonIBD vs. CD** | **FDR-nonIBD vs. CD** |
| HILn_QI11981 | 831.72 | 141.56 | 357.91 | -2.55 | 0.00 | 0.00 | 1.34 | 0.01 | 0.02 | -1.22 | 0.00 | 0.00 |
| C18n_QI1038 | 1070.70 | 11262.18 | 12365.80 | 3.39 | 0.00 | 0.00 | 0.13 | 0.10 | 0.12 | 3.53 | 0.00 | 0.00 |
| C18n_QI382 | 1335.90 | 20738.64 | 9702.79 | 3.96 | 0.00 | 0.00 | -1.10 | 0.00 | 0.00 | 2.86 | 0.00 | 0.00 |
| HILn_QI12814 | 94920.65 | 35692.26 | 39246.89 | -1.41 | 0.00 | 0.00 | 0.14 | 0.34 | 0.37 | -1.27 | 0.00 | 0.00 |
| HILp_QI10008 | 682642.35 | 347419.92 | 380084.22 | -0.97 | 0.00 | 0.00 | 0.13 | 0.06 | 0.09 | -0.84 | 0.00 | 0.00 |
| C18n_QI6687 | 19214.52 | 34355.54 | 55069.18 | 0.84 | 0.00 | 0.01 | 0.68 | 0.03 | 0.06 | 1.52 | 0.00 | 0.00 |
| C8p_QI10089 | 723.51 | 4794.44 | 11850.52 | 2.73 | 0.11 | 0.17 | 1.31 | 0.05 | 0.08 | 4.03 | 0.00 | 0.00 |
| C18n_QI1192 | 553.91 | 771.44 | 2039.11 | 0.48 | 0.32 | 0.42 | 1.40 | 0.05 | 0.08 | 1.88 | 0.00 | 0.00 |
| HILp_QI5507 | 55744.53 | 87622.87 | 46664.41 | 0.65 | 0.02 | 0.04 | -0.91 | 0.00 | 0.00 | -0.26 | 0.04 | 0.06 |
| C18n_QI6040 | 103105.76 | 55941.10 | 91531.68 | -0.88 | 0.03 | 0.06 | 0.71 | 0.01 | 0.02 | -0.17 | 0.59 | 0.67 |
| 1.8.4.11: Peptide-methionine (S)-S-oxide reductase|g__Bacteroides.s__Bacteroides_uniformis | 0.00 | 0.00 | 0.00 | 0.75 | 0.31 | 0.42 | -0.58 | 0.22 | 0.25 | 0.18 | 0.61 | 0.67 |
| HILp_QI3065 | 65005.86 | 182773.15 | 128066.44 | 1.49 | 0.00 | 0.00 | -0.51 | 0.17 | 0.20 | 0.98 | 0.00 | 0.00 |
| C18n_QI4210 | 86372.10 | 42113.23 | 72242.98 | -1.04 | 0.00 | 0.00 | 0.78 | 0.00 | 0.00 | -0.26 | 0.04 | 0.06 |
| HILp_QI9362 | 54195.87 | 80041.44 | 33639.82 | 0.56 | 0.05 | 0.09 | -1.25 | 0.00 | 0.00 | -0.69 | 0.00 | 0.00 |
| HILn_QI15356 | 39643.73 | 11385.87 | 12888.49 | -1.80 | 0.00 | 0.00 | 0.18 | 0.06 | 0.08 | -1.62 | 0.00 | 0.00 |
| C18n_QI10170 | 533756.81 | 349045.41 | 736907.57 | -0.61 | 0.01 | 0.02 | 1.08 | 0.00 | 0.00 | 0.47 | 0.00 | 0.01 |
| C8p_QI19750 | 1707.45 | 11542.79 | 3375.16 | 2.76 | 0.73 | 0.77 | -1.77 | 0.06 | 0.09 | 0.98 | 0.00 | 0.00 |
| HILn_QI17486 | 20812.67 | 20840.03 | 30347.55 | 0.00 | 0.88 | 0.91 | 0.54 | 0.04 | 0.08 | 0.54 | 0.01 | 0.02 |
| C18n_QI12711 | 5082.34 | 5896.74 | 8214.83 | 0.21 | 0.50 | 0.60 | 0.48 | 0.01 | 0.02 | 0.69 | 0.00 | 0.01 |
| C18n_QI402 | 623.59 | 975.33 | 879.46 | 0.65 | 0.00 | 0.01 | -0.15 | 0.86 | 0.88 | 0.50 | 0.00 | 0.00 |
| C8p_QI3505 | 39948.83 | 175381.13 | 103791.67 | 2.13 | 0.04 | 0.07 | -0.76 | 0.96 | 0.96 | 1.38 | 0.00 | 0.00 |
| C18n_QI13257 | 121238.47 | 51365.28 | 60003.54 | -1.24 | 0.00 | 0.00 | 0.22 | 0.16 | 0.19 | -1.01 | 0.00 | 0.00 |
| C8p_QI22510 | 100413.69 | 206212.18 | 117496.16 | 1.04 | 0.07 | 0.12 | -0.81 | 0.06 | 0.09 | 0.23 | 0.79 | 0.82 |
| C8p_QI26385 | 83.76 | 5030.41 | 2732.51 | 5.91 | 0.00 | 0.00 | -0.88 | 0.04 | 0.07 | 5.03 | 0.04 | 0.06 |
| HILp_QI254 | 16865.78 | 23226.69 | 20203.65 | 0.46 | 0.04 | 0.08 | -0.20 | 0.04 | 0.08 | 0.26 | 0.70 | 0.74 |
| C8p_QI851 | 7890.51 | 9759.97 | 7540.34 | 0.31 | 0.07 | 0.12 | -0.37 | 0.00 | 0.01 | -0.07 | 0.10 | 0.14 |
| HILn_TF1 | 2497191.99 | 2773760.92 | 2005336.35 | 0.15 | 0.69 | 0.74 | -0.47 | 0.05 | 0.08 | -0.32 | 0.02 | 0.04 |
| HILp_QI6854 | 247283.27 | 187661.18 | 222906.66 | -0.40 | 0.00 | 0.00 | 0.25 | 0.00 | 0.00 | -0.15 | 0.35 | 0.44 |
| HILp_QI10973 | 291.58 | 1609.59 | 732.30 | 2.46 | 0.01 | 0.02 | -1.14 | 0.05 | 0.08 | 1.33 | 0.41 | 0.50 |
| HILn_QI11589 | 12959.84 | 6675.28 | 17139.26 | -0.96 | 0.02 | 0.04 | 1.36 | 0.01 | 0.03 | 0.40 | 0.47 | 0.57 |
| HILp_QI1546 | 19102.81 | 36870.82 | 24601.38 | 0.95 | 0.00 | 0.00 | -0.58 | 0.00 | 0.02 | 0.37 | 0.31 | 0.40 |
| HILp_QI13897 | 142013.87 | 319559.90 | 87479.40 | 1.17 | 0.59 | 0.65 | -1.87 | 0.02 | 0.04 | -0.70 | 0.01 | 0.02 |
| HILn_QI27455 | 1722.12 | 1654.10 | 4283.63 | -0.06 | 0.02 | 0.04 | 1.37 | 0.00 | 0.00 | 1.31 | 0.04 | 0.06 |
| HILp_QI7921 | 4323.10 | 5480.03 | 3116.89 | 0.34 | 0.23 | 0.33 | -0.81 | 0.00 | 0.00 | -0.47 | 0.00 | 0.01 |
| HILn_QI14808 | 4113.78 | 2378.74 | 3791.18 | -0.79 | 0.02 | 0.04 | 0.67 | 0.01 | 0.03 | -0.12 | 0.85 | 0.86 |
| HILn_QI23355 | 704951.20 | 2305389.74 | 1260071.52 | 1.71 | 0.00 | 0.00 | -0.87 | 0.00 | 0.00 | 0.84 | 0.00 | 0.00 |
| HILn_QI12800 | 7829.69 | 10458.87 | 37015.56 | 0.42 | 0.00 | 0.00 | 1.82 | 0.00 | 0.01 | 2.24 | 0.60 | 0.67 |
| HILn_QI2624 | 160.01 | 144.31 | 1049.45 | -0.15 | 0.59 | 0.65 | 2.86 | 0.00 | 0.00 | 2.71 | 0.00 | 0.00 |
| HILn_QI28558 | 143061.95 | 142635.18 | 285309.45 | 0.00 | 0.01 | 0.02 | 1.00 | 0.00 | 0.01 | 1.00 | 0.24 | 0.32 |
| HILp_QI2140 | 25253.83 | 15783.28 | 23711.89 | -0.68 | 0.00 | 0.00 | 0.59 | 0.01 | 0.03 | -0.09 | 0.21 | 0.29 |
| HILn_QI30399 | 63210.90 | 55221.26 | 76704.73 | -0.19 | 0.14 | 0.21 | 0.47 | 0.03 | 0.06 | 0.28 | 0.14 | 0.20 |
| C18n_QI7063 | 3256.31 | 1371.59 | 5378.52 | -1.25 | 0.00 | 0.01 | 1.97 | 0.00 | 0.01 | 0.72 | 0.49 | 0.57 |
| C18n_QI6139 | 215250.85 | 248787.77 | 109021.68 | 0.21 | 0.31 | 0.42 | -1.19 | 0.02 | 0.05 | -0.98 | 0.00 | 0.00 |
| HILp_QI13610 | 8609.69 | 8366.95 | 9248.68 | -0.04 | 0.02 | 0.04 | 0.14 | 0.03 | 0.06 | 0.10 | 0.87 | 0.87 |
| HILp_QI722 | 100.06 | 126.44 | 216.77 | 0.34 | 0.22 | 0.33 | 0.78 | 0.09 | 0.11 | 1.12 | 0.00 | 0.00 |
| HILp_QI4387 | 31361.69 | 46977.46 | 100447.45 | 0.58 | 0.28 | 0.39 | 1.10 | 0.00 | 0.01 | 1.68 | 0.00 | 0.00 |
| HILp_QI6584 | 21168.08 | 41651.10 | 23810.49 | 0.98 | 0.53 | 0.61 | -0.81 | 0.77 | 0.80 | 0.17 | 0.70 | 0.74 |
| C8p_QI22523 | 4093.13 | 3281.72 | 1363.12 | -0.32 | 0.02 | 0.04 | -1.27 | 0.43 | 0.46 | -1.59 | 0.02 | 0.04 |
| HILp_QI7167 | 348463.73 | 528332.56 | 314888.98 | 0.60 | 0.41 | 0.51 | -0.75 | 0.09 | 0.11 | -0.15 | 0.00 | 0.01 |
| C8p_QI11994 | 578.55 | 990.79 | 1835.51 | 0.78 | 0.44 | 0.54 | 0.89 | 0.11 | 0.14 | 1.67 | 0.00 | 0.01 |
| HILp_QI5854 | 15147.91 | 6479.15 | 10292.06 | -1.23 | 0.35 | 0.45 | 0.67 | 0.06 | 0.09 | -0.56 | 0.00 | 0.00 |
| C8p_QI20261 | 1442.41 | 1101.56 | 3331.57 | -0.39 | 0.91 | 0.92 | 1.60 | 0.00 | 0.01 | 1.21 | 0.00 | 0.00 |
| 4.1.1.49: Phosphoenolpyruvate carboxykinase (ATP)|g__Odoribacter.s__Odoribacter_splanchnicus | 0.00 | 0.00 | 0.00 | -1.10 | 0.00 | 0.00 | 1.89 | 0.00 | 0.00 | 0.79 | 0.57 | 0.66 |
| HILp_QI7275 | 67706.66 | 60010.82 | 76088.96 | -0.17 | 0.23 | 0.33 | 0.34 | 0.41 | 0.45 | 0.17 | 0.00 | 0.01 |
| HILn_QI4111 | 7776.50 | 6925.21 | 11206.33 | -0.17 | 0.51 | 0.60 | 0.69 | 0.07 | 0.09 | 0.53 | 0.13 | 0.18 |
| 4.2.3.3: Methylglyoxal synthase|g__Bacteroides.s__Bacteroides_vulgatus | 0.00 | 0.00 | 0.00 | -0.92 | 0.03 | 0.05 | 0.53 | 0.56 | 0.59 | -0.39 | 0.05 | 0.07 |
| HILn_QI6680 | 18417.26 | 4943.67 | 10259.73 | -1.90 | 0.01 | 0.02 | 1.05 | 0.04 | 0.08 | -0.84 | 0.28 | 0.37 |
| 3.6.4.12: DNA helicase|g__Ruminococcus.s__Ruminococcus_lactaris | 0.00 | 0.00 | 0.00 | 0.11 | 0.58 | 0.65 | -0.52 | 0.02 | 0.04 | -0.41 | 0.04 | 0.06 |
| 3.6.1.1: Inorganic diphosphatase|g__Lachnospiraceae_noname.s__Lachnospiraceae_bacterium_7_1_58FAA | 0.00 | 0.00 | 0.00 | -1.91 | 0.95 | 0.95 | 3.72 | 0.07 | 0.09 | 1.81 | 0.01 | 0.03 |

| **Supplementary Table s4:** **Wilcoxon rank-sum test of all biomarkers of model3** | | | | | | | | | | | | |
| --- | --- | --- | --- | --- | --- | --- | --- | --- | --- | --- | --- | --- |
| **Markers** | **nonIBD_mean** | **UC_mean** | **CD_mean** | **log2(fc-nonIBD vs. UC)** | **Pvalue-nonIBD vs. UC)** | **FDR-nonIBD vs. UC)** | **log2(fc-UC vs. CD)** | **Pvalue-UC vs. CD** | **FDR-UC vs. CD** | **log2(fc-nonIBD vs. CD)** | **Pvalue-nonIBD vs. CD** | **FDR-nonIBD vs. CD** |
| C18n_QI3056 | 8673.56 | 2001779.76 | 1324098.28 | 7.85 | 3.32E-10 | 7.30E-09 | -0.60 | 0.01 | 0.07 | 7.25 | 1.87E-04 | 3.74E-04 |
| C8p_QI7865 | 8391.67 | 69877.14 | 59656.92 | 3.06 | 0.00 | 0.00 | -0.23 | 7.26E-01 | 0.89 | 2.83 | 1.84E-07 | 8.07E-07 |
| C18n_QI12976 | 52560.66 | 24359.38 | 17362.58 | -1.11 | 9.87E-05 | 4.36E-04 | -0.49 | 6.30E-01 | 8.64E-01 | -1.60 | 0.00 | 0.00 |
| C8p_QI16727 | 10365.91 | 26335.24 | 126104.33 | 1.35 | 3.58E-01 | 3.94E-01 | 2.26 | 9.93E-04 | 2.18E-02 | 3.60 | 7.41E-08 | 0.00 |
| C8p_QI20507 | 3008.69 | 30205.24 | 35782.61 | 3.33 | 1.17E-04 | 4.36E-04 | 0.24 | 9.79E-01 | 9.79E-01 | 3.57 | 9.35E-06 | 3.43E-05 |
| HILn_QI18128 | 1453.30 | 161.69 | 302.94 | -3.17 | 2.45E-08 | 2.70E-07 | 0.91 | 0.93 | 0.97 | -2.26 | 1.36E-07 | 7.51E-07 |
| C18n_QI13373 | 94112.69 | 42508.90 | 43790.69 | -1.15 | 0.00 | 0.00 | 0.04 | 0.53 | 0.84 | -1.10 | 2.21E-05 | 0.00 |
| 3.2.1.52: Beta-N-acetylhexosaminidase|g__Flavonifractor.s__Flavonifractor_plautii | 0.00 | 0.00 | 0.00 | 2.14 | 7.41E-02 | 0.10 | 1.26 | 0.49 | 0.84 | 3.40 | 4.99E-03 | 7.31E-03 |
| C18n_QI10541 | 29129.49 | 17025.83 | 14924.11 | -0.77 | 0.00 | 0.00 | -0.19 | 6.68E-01 | 8.64E-01 | -0.96 | 1.04E-04 | 2.28E-04 |
| HILp_QI394 | 15898.92 | 15958.00 | 13246.81 | 0.01 | 0.60 | 0.63 | -0.27 | 0.03 | 0.18 | -0.26 | 0.00 | 0.00 |
| HILp_QI5928 | 109172.85 | 664617.52 | 258665.25 | 2.61 | 7.57E-04 | 1.85E-03 | -1.36 | 6.49E-01 | 8.64E-01 | 1.24 | 0.00 | 0.00 |
| HILp_QI9302 | 37305.81 | 19341.03 | 16734.78 | -0.95 | 2.39E-03 | 4.39E-03 | -0.21 | 0.16 | 0.44 | -1.16 | 1.58E-05 | 4.97E-05 |
| HILp_QI21102 | 6425.17 | 22302.79 | 26964.86 | 1.80 | 1.19E-01 | 1.54E-01 | 0.27 | 0.34 | 0.69 | 2.07 | 0.75 | 0.75 |
| HILp_QI24842 | 52490.65 | 40821.10 | 75770.53 | -0.36 | 2.56E-02 | 3.76E-02 | 0.89 | 0.00 | 0.03 | 0.53 | 1.19E-01 | 1.46E-01 |
| C18n_QI5448 | 23371.27 | 13182.10 | 13469.03 | -0.83 | 1.43E-03 | 3.15E-03 | 0.03 | 0.80 | 0.92 | -0.80 | 1.14E-02 | 1.57E-02 |
| HILn_QI9324 | 173325.12 | 62442.76 | 131107.72 | -1.47 | 1.65E-03 | 3.30E-03 | 1.07 | 1.48E-01 | 4.39E-01 | -0.40 | 1.58E-01 | 1.83E-01 |
| C8p_QI19571 | 28798.02 | 10210.31 | 2539.92 | -1.50 | 7.53E-04 | 1.85E-03 | -2.01 | 2.48E-01 | 6.06E-01 | -3.50 | 7.24E-08 | 0.00 |
| HILp_QI5452 | 20128.35 | 19505.59 | 5995.47 | -0.05 | 2.07E-02 | 3.26E-02 | -1.70 | 0.84 | 0.93 | -1.75 | 1.31E-03 | 2.21E-03 |
| 1.1.1.3: Homoserine dehydrogenase|g__Faecalibacterium.s__Faecalibacterium_prausnitzii | 0.00 | 0.00 | 0.00 | 0.29 | 1.63E-01 | 1.99E-01 | -0.39 | 0.13 | 0.44 | -0.10 | 6.04E-01 | 6.36E-01 |
| HILp_QI5937 | 8337.00 | 7563.86 | 4930.39 | -0.14 | 0.21 | 0.24 | -0.62 | 0.08 | 0.36 | -0.76 | 9.09E-05 | 2.22E-04 |
| C8p_QI15740 | 1047098.11 | 719861.76 | 848214.81 | -0.54 | 0.00 | 0.00 | 0.24 | 0.28 | 0.61 | -0.30 | 0.02 | 0.02 |
| 2.8.1.10: Thiazole synthase | 0.00 | 0.00 | 0.00 | -0.28 | 0.73 | 0.73 | 0.26 | 0.51 | 0.84 | -0.02 | 0.61 | 0.64 |

| **Supplementary Table s5: Metabolite feature metadata** | | | | |
| --- | --- | --- | --- | --- |
| **Method** | **Pooled QC sample CV** | **m/z** | **RT** | **Compound** |
| C18-neg | 0.037775 | 273.0519 | 0.75 | C18n_QI3056 |
| C18-neg | 0.054083 | 188.0921 | 0.87 | C18n_QI1231 |
| C18-neg | 0.129038 | 380.1833 | 0.95 | C18n_QI6372 |
| C18-neg | 0.313653 | 245.049 | 0.97 | C18n_QI2282 |
| C18-neg | 0.120775 | 337.141 | 1.36 | C18n_QI5020 |
| C18-neg | 0.051789 | 123.0076 | 1.58 | C18n_QI382 |
| C18-neg | 0.101354 | 316.0653 | 1.6 | C18n_QI4365 |
| C18-neg | 0.038114 | 179.0277 | 1.89 | C18n_QI1038 |
| C18-neg | 0.150989 | 186.1128 | 1.97 | C18n_QI1192 |
| C18-neg | 0.109157 | 351.0853 | 2.09 | C18n_QI5448 |
| C18-neg | 0.160953 | 124.0393 | 2.61 | C18n_QI402 |
| C18-neg | 0.055173 | 454.1629 | 3.27 | C18n_QI8756 |
| C18-neg | 0.016887 | 91.0539 | 3.68 | C18n_QI131 |
| C18-neg | 0.04491 | 135.044 | 4.04 | C18n_QI506 |
| C18-neg | 0.057546 | 271.0726 | 6.04 | C18n_QI2985 |
| C18-neg | 0.092786 | 427.1796 | 6.1 | C18n_QI7894 |
| C18-neg | 0.149259 | 764.327 | 6.74 | C18n_QI13633 |
| C18-neg | 0.02877 | 373.1692 | 7.5 | C18n_QI6139 |
| C18-neg | 0.046546 | 513.3432 | 8 | C18n_QI10593 |
| C18-neg | 0.186208 | 509.258 | 8.17 | C18n_QI10481 |
| C18-neg | 0.026032 | 501.3223 | 9.76 | C18n_QI10254 |
| C18-neg | 0.123093 | 641.4636 | 10.42 | C18n_QI12976 |
| C18-neg | 0.053177 | 370.2389 | 10.43 | C18n_QI6040 |
| C18-neg | 0.033539 | 446.2373 | 10.43 | C18n_QI8468 |
| C18-neg | 0.043163 | 311.223 | 10.48 | C18n_QI4210 |
| C18-neg | 0.072489 | 459.3104 | 10.49 | C18n_QI8909 |
| C18-neg | 0.166696 | 400.2323 | 10.64 | C18n_QI7063 |
| C18-neg | 0.02053 | 499.3098 | 10.9 | C18n_QI10170 |
| C18-neg | 0.075752 | 4.01E+02 | 1.11E+01 | C18n_QI7082 |
| C18-neg | 0.060122 | 685.4638 | 12.77 | C18n_QI13281 |
| C18-neg | 0.089731 | 511.3408 | 13 | C18n_QI10541 |
| C18-neg | 0.049581 | 701.4321 | 13.55 | C18n_QI13373 |
| C18-neg | 0.17669 | 391.2868 | 13.62 | C18n_QI6774 |
| C18-neg | 0.173511 | 389.2232 | 14.7 | C18n_QI6687 |
| C18-neg | 0.13764 | 386.2704 | 15.34 | C18n_QI6575 |
| C18-neg | 0.520905 | 617.4776 | 15.92 | C18n_QI12711 |
| C18-neg | 0.277546 | 617.4774 | 16.06 | C18n_QI12710 |
| C18-neg | 0.08368 | 679.462 | 16.78 | C18n_QI13257 |
| C18-neg | 0.109525 | 693.4409 | 17.74 | C18n_QI13314 |
| C18-neg | 0.208064 | 661.451 | 17.88 | C18n_QI13144 |
| C8-pos | 0.402725 | 756.5521 | 8.12 | C8p_QI23 |
| C8-pos | 0.346521 | 371.0896 | 2.83 | C8p_QI5458 |
| C8-pos | 0.206097 | 391.2089 | 3.16 | C8p_QI6477 |
| C8-pos | 0.354473 | 545.3247 | 3.32 | C8p_QI14747 |
| C8-pos | 0.378823 | 742.3437 | 3.38 | C8p_QI24209 |
| C8-pos | 1.56E+00 | 8.30E+02 | 3.44E+00 | C8p_QI26385 |
| C8-pos | 0.157388 | 514.3593 | 3.71 | C8p_QI13043 |
| C8-pos | 0.420301 | 227.1643 | 3.76 | C8p_QI851 |
| C8-pos | 0.212769 | 327.078 | 3.91 | C8p_QI3478 |
| C8-pos | 1.256459 | 558.3146 | 3.96 | C8p_QI15419 |
| C8-pos | 0.624961 | 639.2078 | 3.99 | C8p_QI19750 |
| C8-pos | 0.117773 | 345.2402 | 4.4 | C8p_QI4276 |
| C8-pos | 0.075444 | 327.2291 | 5.34 | C8p_QI3505 |
| C8-pos | 5.78E-01 | 3.83E+02 | 5.51E+00 | C8p_QI6064 |
| C8-pos | 0.038261 | 359.3155 | 5.81 | C8p_QI4934 |
| C8-pos | 0.130024 | 915.7254 | 6.29 | C8p_QI27992 |
| C8-pos | 0.575505 | 712.5873 | 6.31 | C8p_QI23150 |
| C8-pos | 0.121297 | 459.3237 | 6.44 | C8p_QI10089 |
| C8-pos | 0.042333 | 417.3341 | 6.61 | C8p_QI7865 |
| C8-pos | 0.029765 | 435.3242 | 6.63 | C8p_QI8796 |
| C8-pos | 0.95539 | 495.3009 | 6.65 | C8p_QI11994 |
| C8-pos | 0.072284 | 413.3626 | 6.91 | C8p_QI7645 |
| C8-pos | 4.91E-01 | 6.99E+02 | 7.00E+00 | C8p_QI22523 |
| C8-pos | 2.34E-01 | 809.7177 | 7.47E+00 | C8p_QI25956 |
| C8-pos | 0.02863 | 564.4962 | 7.67 | C8p_QI15740 |
| C8-pos | 0.147244 | 475.3779 | 7.74 | C8p_QI10951 |
| C8-pos | 0.090365 | 582.4855 | 7.82 | C8p_QI16727 |
| C8-pos | 0.06948 | 696.5558 | 8.21 | C8p_QI22437 |
| C8-pos | 0.533365 | 635.5025 | 8.7 | C8p_QI19571 |
| C8-pos | 0.170777 | 804.5781 | 9.13 | C8p_QI25824 |
| C8-pos | 0.067382 | 581.5508 | 9.6 | C8p_QI16688 |
| C8-pos | 0.115652 | 655.5631 | 9.86 | C8p_QI20507 |
| C8-pos | 0.343674 | 650.6377 | 10.16 | C8p_QI20261 |
| C8-pos | 0.211785 | 698.255 | 10.29 | C8p_QI22510 |
| C8-pos | 0.051222 | 1045.8248 | 11.18 | C8p_QI29484 |
| C8-pos | 0.595325 | 873.7314 | 11.65 | C8p_QI27233 |
| HILIC-neg | 0.072934 | 160.0615 | 5.25 | HILn_TF1 |
| HILIC-neg | 0.092213 | 689.3644 | 0.98 | HILn_QI9324 |
| HILIC-neg | 1.09765 | 276.1098 | 1.14 | HILn_QI27455 |
| HILIC-neg | 0.073199 | 144.0456 | 1.2 | HILn_QI23355 |
| HILIC-neg | 0.506898 | 211.0615 | 1.27 | HILn_QI14808 |
| HILIC-neg | 0.422911 | 218.0673 | 1.41 | HILn_QI11589 |
| HILIC-neg | 2.160366 | 266.0961 | 1.58 | HILn_QI18073 |
| HILIC-neg | 0.248271 | 143.1191 | 1.63 | HILn_QI8463 |
| HILIC-neg | 0.045364 | 139.0402 | 1.66 | HILn_QI30399 |
| HILIC-neg | 0.078213 | 149.8027 | 1.73 | HILn_QI4111 |
| HILIC-neg | 0.748156 | 315.088 | 1.8 | HILn_QI6680 |
| HILIC-neg | 4.08E-01 | 2.08E+02 | 2.08E+00 | HILn_QI8435 |
| HILIC-neg | 0.839068 | 213.1247 | 2.63 | HILn_QI2624 |
| HILIC-neg | 5.24E-01 | 4.95E+02 | 2.78E+00 | HILn_QI15191 |
| HILIC-neg | 0.289945 | 519.2796 | 2.83 | HILn_QI24862 |
| HILIC-neg | 0.084739 | 427.2184 | 2.87 | HILn_QI8112 |
| HILIC-neg | 0.060371 | 229.1195 | 2.89 | HILn_QI17486 |
| HILIC-neg | 0.628281 | 280.1307 | 2.97 | HILn_QI4584 |
| HILIC-neg | 0.618878 | 469.2576 | 3.08 | HILn_QI7559 |
| HILIC-neg | 0.059422 | 531.2995 | 3.31 | HILn_QI13282 |
| HILIC-neg | 2.256488 | 351.1303 | 3.4 | HILn_QI25300 |
| HILIC-neg | 0.036285 | 158.0824 | 3.47 | HILn_QI33327 |
| HILIC-neg | 0.174423 | 380.2308 | 3.51 | HILn_QI8306 |
| HILIC-neg | 0.08986 | 347.2445 | 3.69 | HILn_QI12814 |
| HILIC-neg | 4.39E-02 | 1.89E+02 | 3.79E+00 | HILn_QI28558 |
| HILIC-neg | 0.681829 | 495.3332 | 3.95 | HILn_QI12800 |
| HILIC-neg | 0.540649 | 97.0659 | 3.99 | HILn_QI33358 |
| HILIC-neg | 0.585974 | 193.0178 | 4 | HILn_QI24418 |
| HILIC-neg | 0.367309 | 239.0927 | 4.09 | HILn_QI3904 |
| HILIC-neg | 1.410098 | 155.033 | 4.17 | HILn_QI1116 |
| HILIC-neg | 0.513094 | 152.0719 | 4.27 | HILn_QI18128 |
| HILIC-neg | 0.09427 | 309.1349 | 4.53 | HILn_QI1241 |
| HILIC-neg | 6.43E-01 | 1.82E+02 | 4.7 | HILn_QI11981 |
| HILIC-neg | 0.868308 | 281.9791 | 4.99 | HILn_QI24132 |
| HILIC-neg | 0.540468 | 208.0733 | 5.88 | HILn_QI31972 |
| HILIC-neg | 0.194656 | 460.2348 | 6.59 | HILn_QI3222 |
| HILIC-neg | 0.076939 | 156.0305 | 6.6 | HILn_QI23150 |
| HILIC-neg | 0.784993 | 193.0564 | 6.67 | HILn_QI17951 |
| HILIC-neg | 0.273918 | 275.0232 | 6.88 | HILn_QI782 |
| HILIC-neg | 0.058345 | 113.0609 | 6.9 | HILn_QI31959 |
| HILIC-neg | 0.14991 | 401.1281 | 6.96 | HILn_QI5881 |
| HILIC-neg | 0.872429 | 212.0204 | 8.4 | HILn_QI15356 |
| HILIC-pos | 0.158803 | 723.626 | 1.49 | HILp_QI24842 |
| HILIC-pos | 0.928062 | 394.3175 | 1.67 | HILp_QI11742 |
| HILIC-pos | 4.226161 | 153.1269 | 1.68 | HILp_QI2026 |
| HILIC-pos | 0.159773 | 315.1965 | 1.8 | HILp_QI9302 |
| HILIC-pos | 0.499728 | 208.1695 | 1.82 | HILp_QI4387 |
| HILIC-pos | 0.082313 | 109.0653 | 1.83 | HILp_QI394 |
| HILIC-pos | 0.71149 | 322.1667 | 1.83 | HILp_QI9539 |
| HILIC-pos | 0.483744 | 122.0507 | 1.98 | HILp_QI722 |
| HILIC-pos | 0.498175 | 243.0862 | 2.01 | HILp_QI5937 |
| HILIC-pos | 0.050131 | 180.0658 | 2.07 | HILp_QI3109 |
| HILIC-pos | 0.13323 | 206.045 | 2.19 | HILp_QI4288 |
| HILIC-pos |  | 364.2472 | 2.26 | HILp_QI10973 |
| HILIC-pos | 0.474894 | 156.1042 | 2.28 | HILp_QI2187 |
| HILIC-pos | 0.499475 | 224.1728 | 2.6 | HILp_QI5082 |
| HILIC-pos | 1.735556 | 168.0684 | 2.75 | HILp_QI2700 |
| HILIC-pos | 0.045702 | 211.1331 | 3.08 | HILp_QI4542 |
| HILIC-pos | 0.539455 | 246.0771 | 3.22 | HILp_QI6087 |
| HILIC-pos | 0.06766 | 335.1971 | 3.87 | HILp_QI10008 |
| HILIC-pos | 0.064066 | 263.1029 | 4.32 | HILp_QI6854 |
| HILIC-pos | 0.106764 | 156.0658 | 4.37 | HILp_QI2140 |
| HILIC-pos | 0.145641 | 100.0654 | 4.39 | HILp_QI254 |
| HILIC-pos | 0.033364 | 178.0728 | 4.52 | HILp_QI3065 |
| HILIC-pos | 0.105406 | 488.3374 | 5.1 | HILp_QI13897 |
| HILIC-pos | 0.2315 | 441.3299 | 5.24 | HILp_QI12884 |
| HILIC-pos | 0.648875 | 213.0877 | 5.63 | HILp_QI4614 |
| HILIC-pos | 0.18526 | 231.1137 | 5.63 | HILp_QI5452 |
| HILIC-pos | 0.385224 | 256.1649 | 5.73 | HILp_QI6584 |
| HILIC-pos | 0.696704 | 593.4443 | 5.77 | HILp_QI20321 |
| HILIC-pos | 0.085466 | 358.2942 | 5.83 | HILp_QI10799 |
| HILIC-pos | 0.239276 | 398.429 | 5.9 | HILp_QI11840 |
| HILIC-pos | 0.017312 | 474.1743 | 5.92 | HILp_QI13610 |
| HILIC-pos | 0.060707 | 240.1595 | 6.31 | HILp_QI5854 |
| HILIC-pos | 0.168321 | 227.1754 | 6.53 | HILp_QI5262 |
| HILIC-pos | 0.019853 | 237.1601 | 6.75 | HILp_QI5723 |
| HILIC-pos | 0.182028 | 274.1401 | 7.23 | HILp_QI7404 |
| HILIC-pos | 0.130436 | 318.1664 | 7.31 | HILp_QI9423 |
| HILIC-pos | 0.07565 | 171.1131 | 7.43 | HILp_QI2815 |
| HILIC-pos | 0.080054 | 224.0436 | 7.59 | HILp_QI5041 |
| HILIC-pos | 0.15061 | 272.1136 | 7.65 | HILp_QI7275 |
| HILIC-pos | 0.167884 | 232.1296 | 7.96 | HILp_QI5507 |
| HILIC-pos | 0.150068 | 317.0934 | 7.97 | HILp_QI9362 |
| HILIC-pos | 0.043232 | 270.0975 | 8.01 | HILp_QI7167 |
| HILIC-pos | 0.707802 | 237.124 | 8.12 | HILp_QI5704 |
| HILIC-pos | 0.44295 | 142.0866 | 9.03 | HILp_QI1546 |
| HILIC-pos | 0.756071 | 285.1439 | 9.71 | HILp_QI7921 |
| HILIC-pos | 1.166013 | 242.1615 | 9.89 | HILp_QI5928 |
| HILIC-pos | 1.702274 | 566.3587 | 9.9 | HILp_QI18079 |
| HILIC-pos | 0.451551 | 354.1777 | 10.12 | HILp_QI10651 |
| HILIC-pos | 3.226495 | 605.7172 | 12.1 | HILp_QI21102 |
